# Supplementary material for: Boron Mitigates Cadmium Toxicity by Reducing Cadmium Accumulation, Enhancing Cell Wall Immobilization and Regulating gene expression in Malus Rootstock
Source: Research Square preprint supplement (doi:10.21203/rs.3.rs-8705252/v1), 2026-02-23
Supplement: Supplementary file 1 [file 4a0ed024e4884a30df81a064.docx]

**Table S1** Primers used for qRT-PCR.

| Gene name | Description | Primer-Forward | Primer-Reverse |
| --- | --- | --- | --- |
| *IRT1a* | Iron-regulated transporter 1 | 5’-TTGACAAGGGAGAAAACGGAGAC-3’ | 5’-AACAACTGAATGGACAATGATACCC-3’ |
| *ZIP6a* | Zrt-/Irt-like protein 6 | 5’-CGGTGGGTGTGGAGAGTAAT-3’ | 5’-ATGTAGGCTGTTGTCCCGAA-3’ |
| *MHXa* | Magnesium proton exchanger protein | 5’-TCAAGTTAGAAGACACGGAATC-3’ | 5’-AGGCACAAATGCGAATAG-3’ |
| *MTP1a* | Metal tolerance protein 1 | 5’-CGACAAGGATCTTGCTGAGC-3’ | 5’-TCCCCAGAACAATGACCGAA-3’ |
| *β-actinb* |  | 5’-TACTCAGCTTTGGCAATCCACATC-3’ | 5’-TGACCGAATGAGCAAGGAAATTACT-3’ |

a: From Zha et al. 2014. Both immanently high active iron contents and increased root ferrous uptake in response to low iron stress contribute to the iron deficiency tolerance in *Malus* *xiaojinensis*. Plant Science. 214:47-56.

b: From Wang et al. 2017. MYB12 and MYB22 play essential roles in proanthocyanidin and flavonol synthesis in red-fleshed apple (*Malus sieversii* f. *niedzwetzkyana*). The Plant Journal, 90(2): 276-292.

**Table S2** Photosynthetic pigments (mg g-1dry weight) in leaves of *Malus hupehensis* exposed to 0 or 50 μM CdCl2 combined with either 0, 12.5, 50 or 150 μM B for 30 days. Data are means ± standard error (SE; n = 3). Different letters after values indicate significant differences between treatments. *P*-values for ANOVA of CdCl2 (Cd), B, and their interactions are shown. **: *P* ≤ 0.01; ***: *P* ≤ 0.001; ****: *P* ≤ 0.0001; ns: not significant. Chl a, chlorophyll a; Chl b, chlorophyll b; Chl (a + b), sum of chlorophyll a and b; Car, carotenoid.

| Treatment | B (μM) | Cd (μM) | Chl (a) | Chl (b) | Chl (a+b) | Car |
| --- | --- | --- | --- | --- | --- | --- |
| B0 | 0 | 0 | 4.94 ± 0.42 b | 1.63 ± 0.13 ab | 6.56 ± 0.55 b | 0.93 ± 0.02 b |
| B1 | 12.5 | 0 | 5.82 ± 0.18 a | 1.89 ± 0.05 a | 7.70 ± 0.23 a | 1.12 ± 0.04 a |
| B2 | 50 | 0 | 4.95 ± 0.35 b | 1.76 ± 0.17 a | 6.72 ± 0.42 b | 0.91 ± 0.05 b |
| B3 | 150 | 0 | 4.76 ± 0.22 b | 1.68 ± 0.05 a | 6.44 ± 0.27 b | 1.04 ± 0.01 a |
| B0+Cd | 0 | 50 | 3.29 ± 0.07 d | 1.11 ± 0.01 c | 4.40 ± 0.08 e | 0.83 ± 0.03 bc |
| B1+Cd | 12.5 | 50 | 3.79 ± 0.16 cd | 1.26 ± 0.06 c | 5.05 ± 0.22 de | 0.77 ± 0.03 c |
| B2+Cd | 50 | 50 | 4.26 ± 0.10 bc | 1.37 ± 0.04 bc | 5.63 ± 0.13 cd | 0.90 ± 0.04 b |
| B3+Cd | 150 | 50 | 3.47 ± 0.22 d | 1.25 ± 0.08 c | 4.71 ± 0.30 de | 0.73 ± 0.04 c |
| *P*-values | | B | ns | ns | ns | ns |
| Cd | **** | **** | **** | **** |
| B×Cd | *** | ** | ** | *** |

**Table S3** Root configuration and vitality of *Malus hupehensis* exposed to 0 or 50 μM CdCl2 combined with either 0, 12.5, 50 or 150 μM B for 30 days. Data are means ± standard error (SE; n = 3). Different letters after values indicate significant differences between treatments. *P*-values for ANOVA of CdCl2 (Cd), B, and their interactions are shown. *: *P* ≤ 0.05; **: *P* ≤ 0.01; ***: *P* ≤ 0.001; ****: *P* ≤ 0.0001; ns: not significant.

| Treatment | B (μM) | Cd (μM) | Total root length  (cm) | Root surface  (cm2) | Root volume  (cm3) | Root vitality  (mg h-1 g-1 DW) |
| --- | --- | --- | --- | --- | --- | --- |
| B0 | 0 | 0 | 2212.80 ± 387.91 ab | 389.11 ± 12.34 bc | 7.49 ± 0.43 ab | 58.93±2.30 d |
| B1 | 12.5 | 0 | 2948.33 ± 97.69 a | 554.83 ± 44.55 a | 8.89 ± 0.40 a | 81.76±2.54 a |
| B2 | 50 | 0 | 2518.80 ± 187.75 ab | 549.18 ± 3.72 a | 7.76 ± 0.38 ab | 73.31±1.25 b |
| B3 | 150 | 0 | 2159.47 ± 73.65 bc | 409.85 ± 13.86 b | 6.29 ± 0.34 bcd | 67.96±2.25 bc |
| B0+Cd | 0 | 50 | 2147.36 ± 103.55 bc | 335.75 ± 0.21c | 4.90 ± 0.49 d | 41.29±1.54 e |
| B1+Cd | 12.5 | 50 | 2697.26 ± 65.47 a | 423.76 ± 34.73 b | 5.38 ± 0.65 cd | 56.96±1.75 d |
| B2+Cd | 50 | 50 | 2446.44 ± 87.91abc | 459.61 ± 28.99 b | 6.94 ± 0.96 bc | 65.10±1.89 c |
| B3+Cd | 150 | 50 | 2022.15 ± 65.53 c | 407.98 ± 8.66 b | 6.48 ± 0.14 bc | 58.51±0.63 d |
| *P*-values | | B | ns | ** | **** | ns |
| Cd | **** | ns | *** | *** |
| B×Cd | *** | ns | * | * |

**Fig. S1** Activities of β-glucosidase, methylcellulase and pectin methylesterase in the root of *Malus hupehensis* exposed to 0 or 50 μM CdCl2 combined with either 0, 12.5, 50 or 150 μM B for 30 days. Data are means ± standard error (SE; n = 3). Different letters on the bars indicate significant differences between treatments. *P*-values for ANOVA of CdCl2 (Cd), B, and their interactions are shown. *: *P* ≤ 0.05; **: *P* ≤ 0.01; ***: *P* ≤ 0.001; ****: *P* ≤ 0.0001; ns: not significant.

**Root**   **Leaf**

**Fig. S2** Free proline, soluble phenolics, ascorbate (ASC), and total thiols (T-SH) in the roots, and leaves of *Malus hupehensis* exposed to 0 or 50 μM CdCl2 combined with either 0, 12.5, 50 or 150 μM B for 30 days. Data are means ± standard error (SE; n = 3). Different letters on the bars indicate significant differences between treatments. *P*-values for ANOVA of CdCl2 (Cd), B, and their interactions are shown. *: *P* ≤ 0.05; **: *P* ≤ 0.01; ***: *P* ≤ 0.001; ****: *P* ≤ 0.0001; ns: not significant.

**Root** **Leaf**

**Fig. S3** Superoxide dismutase (SOD), peroxidase (POD), catalase (CAT), ascorbate peroxidase (APX) and glutathione reductase (GR) in the roots (a1-d1), stems (a2-d2) and leaves (a3-d3) of *Malus hupehensis* exposed to 0 or 50 μM CdCl2 combined with either 0, 12.5, 50 or 150 μM B for 30 days. Data are means ± standard error (SE; n = 3). Different letters on the bars indicate significant differences between treatments. *P*-values for ANOVA of CdCl2 (Cd), B, and their interactions are shown. *: *P* ≤ 0.05; **: *P* ≤ 0.01; ***: *P* ≤ 0.001; ****: *P* ≤ 0.0001; ns: not significant.
